# Supplementary material for: Genetic Variation between Dengue Virus Type 4 Strains Impacts Human Antibody Binding and Neutralization
Source: PubMed Central journal article supplement (PMC6226424; doi:10.1016/j.celrep.2018.10.006), 2018-10-30
Supplement: mmc1.pdf [file mmc1.pdf]

**Cell Reports, Volume 25**

## **Supplemental Information**

### **Genetic Variation between Dengue Virus**

#### **Type 4 Strains Impacts Human**

#### **Antibody Binding and Neutralization**

**Emily N. Gallichotte, Thomas J. Baric, Usha Nivarthi, Matthew J. Delacruz, Rachel Graham, Douglas G. Widman, Boyd L. Yount, Anna P. Durbin, Stephen S. Whitehead, Aravinda M. de Silva, and Ralph S. Baric**

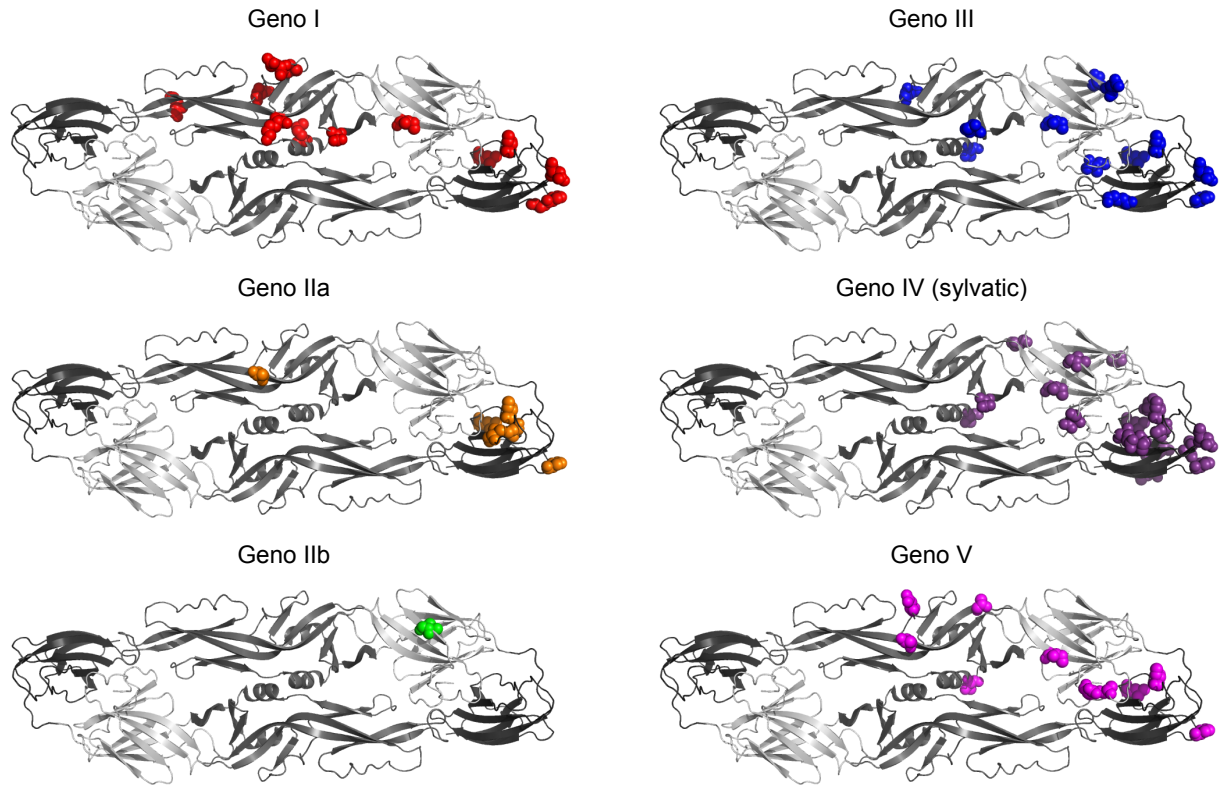

**Supplemental Figure 1. Amino acid diversity of each DENV4 genotype virus.** Related to Figure 2. Differences in envelope protein amino acid sequence of each genotype relative to WT (genotype IIb) were mapped on envelope protein dimer (PBD = 1OAN).

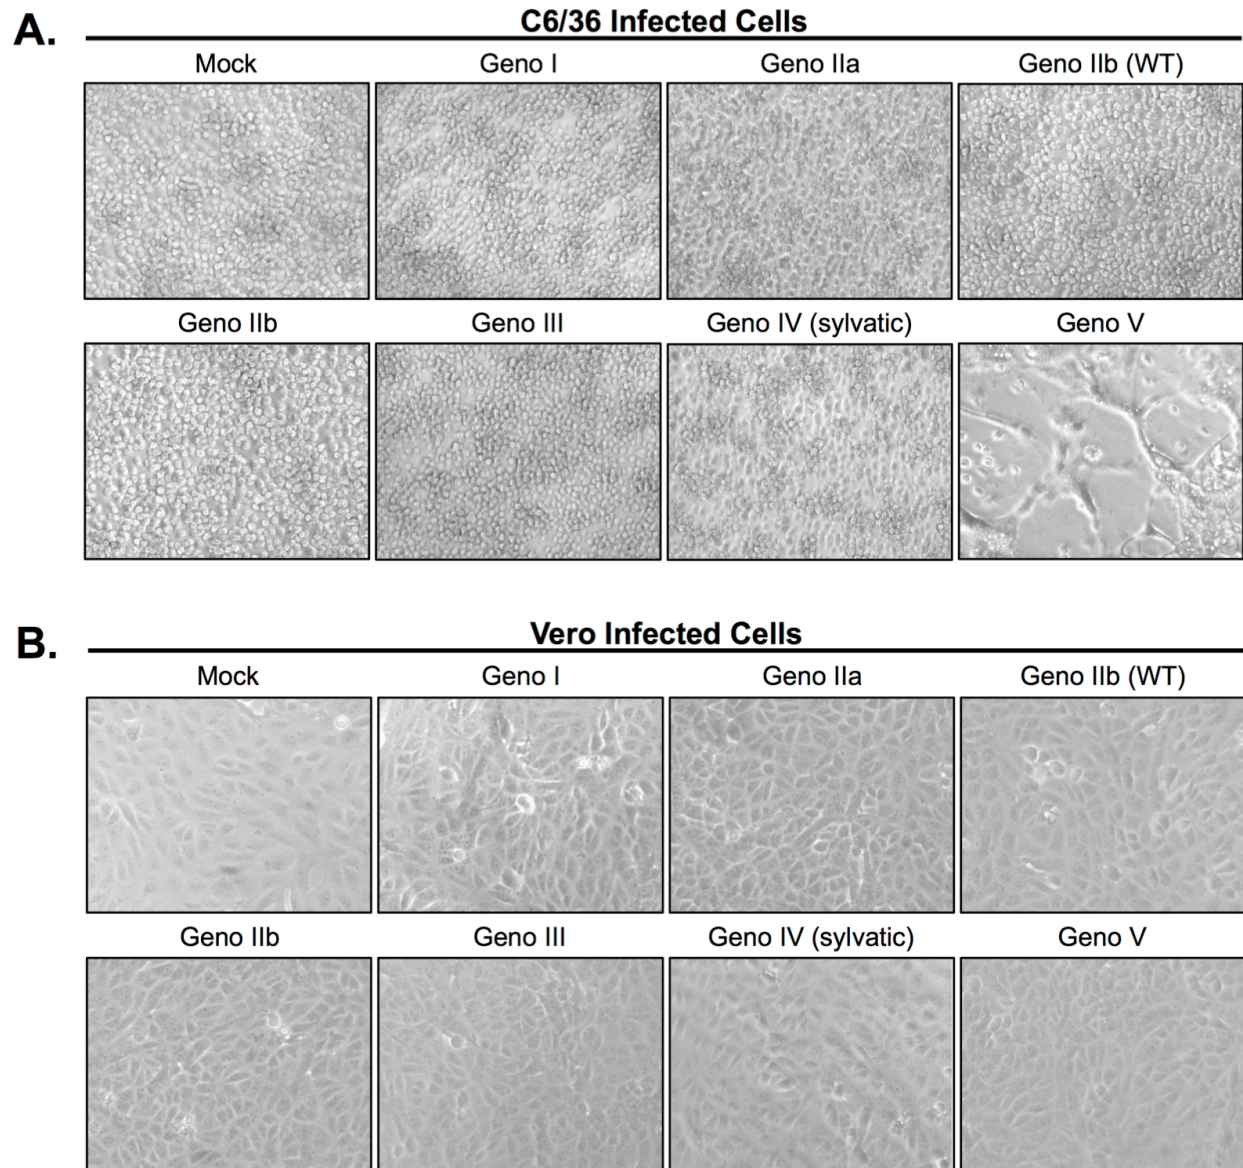

**Supplemental Figure 2. Cytopathic effect of cells infected with DENV4 viruses.** Related to Figure 3. A) C6/36 and B) Vero cells were infected at a multiplicity of infection (MOI) of 0.5 and imaged four days post-infection.

| Virus              | 1 | 2 | 3 | 4 | 5 | 6 | 7 | 8 | 9 | 10 | 11 | 12 | 13 | 14 | 15 | 16 | 17 | 18 | 19 | 20 | 21 | 22 | 23 | 24 | 25 | 26 | 27 | 28 | 29 | 30 | 31 | 32 | 33 | 34 | 35 | 36 | 37 | 38 | 39 | 40 | 41 | 42 | 43 | 44 | 45 | 46 |
|--------------------|---|---|---|---|---|---|---|---|---|----|----|----|----|----|----|----|----|----|----|----|----|----|----|----|----|----|----|----|----|----|----|----|----|----|----|----|----|----|----|----|----|----|----|----|----|----|
| Geno I             | F | H | L | S | T | R | D | G | E | P  | L  | M  | I  | V  | A  | K  | H  | E  | R  | G  | R  | P  | L  | L  | F  | K  | T  | T  | E  | G  | I  | N  | K  | C  | T  | L  | I  | A  | M  | D  | L  | G  | E  | M  | C  | E  |
| Geno IIa*          | F | H | L | S | T | R | D | G | E | P  | L  | M  | I  | V  | A  | K  | H  | E  | R  | G  | R  | P  | L  | L  | F  | K  | T  | T  | E  | G  | I  | N  | K  | C  | T  | L  | I  | A  | M  | D  | L  | G  | E  | M  | C  | E  |
| Geno IIb (WT)      | F | H | L | S | T | R | D | G | E | P  | L  | M  | I  | V  | A  | K  | H  | E  | R  | G  | R  | P  | L  | L  | F  | K  | T  | T  | E  | G  | I  | N  | K  | C  | T  | L  | I  | A  | M  | D  | L  | G  | E  | M  | C  | E  |
| Geno IIb           | F | H | L | S | T | R | D | G | E | P  | L  | M  | I  | V  | A  | K  | H  | E  | R  | G  | R  | P  | L  | L  | F  | K  | T  | T  | E  | G  | I  | N  | K  | C  | T  | L  | I  | A  | M  | D  | L  | G  | E  | M  | C  | E  |
| Geno III*          | F | H | L | S | T | R | D | G | E | P  | L  | M  | I  | V  | A  | K  | H  | E  | R  | G  | R  | P  | L  | L  | F  | K  | T  | T  | E  | G  | I  | N  | K  | C  | T  | L  | I  | A  | M  | D  | L  | G  | E  | M  | C  | E  |
| Geno IV (sylvatic) | F | H | L | S | S | R | D | G | E | P  | L  | M  | I  | V  | A  | K  | H  | E  | R  | G  | R  | P  | L  | L  | F  | K  | T  | T  | E  | G  | I  | N  | K  | C  | T  | L  | I  | A  | M  | D  | V  | G  | E  | M  | C  | E  |
| Geno V             | F | H | L | S | T | R | D | G | E | P  | L  | M  | I  | V  | A  | K  | H  | E  | R  | G  | R  | P  | L  | L  | F  | K  | T  | T  | E  | G  | I  | N  | K  | C  | T  | L  | I  | A  | M  | D  | L  | G  | E  | M  | C  | E  |

  

| Virus              | 47 | 48 | 49 | 50 | 51 | 52 | 53 | 54 | 55 | 56 | 57 | 58 | 59 | 60 | 61 | 62 | 63 | 64 | 65 | 66 | 67 | 68 | 69 | 70 | 71 | 72 | 73 | 74 | 75 | 76 | 77 | 78 | 79 | 80 | 81 | 82 | 83 | 84 | 85 | 86 | 87 | 88 | 89 | 90 | 91 |
|--------------------|----|----|----|----|----|----|----|----|----|----|----|----|----|----|----|----|----|----|----|----|----|----|----|----|----|----|----|----|----|----|----|----|----|----|----|----|----|----|----|----|----|----|----|----|----|
| Geno I             | D  | T  | V  | T  | Y  | K  | C  | P  | L  | L  | V  | N  | T  | E  | P  | E  | D  | I  | D  | C  | W  | C  | N  | L  | T  | S  | A  | W  | V  | M  | Y  | G  | T  | C  | T  | Q  | S  | G  | E  | R  | R  | R  | E  | K  | R  |
| Geno IIa*          | D  | T  | V  | T  | Y  | K  | C  | P  | L  | L  | V  | N  | T  | E  | P  | E  | D  | I  | D  | C  | W  | C  | N  | L  | T  | S  | T  | W  | V  | M  | Y  | G  | T  | C  | T  | Q  | S  | G  | E  | R  | R  | R  | E  | K  | R  |
| Geno IIb (WT)      | D  | T  | V  | T  | Y  | K  | C  | P  | L  | L  | V  | N  | T  | E  | P  | E  | D  | I  | D  | C  | W  | C  | N  | L  | T  | S  | T  | W  | V  | M  | Y  | G  | T  | C  | T  | Q  | S  | G  | E  | R  | R  | R  | E  | K  | R  |
| Geno IIb           | D  | T  | V  | T  | Y  | K  | C  | P  | L  | L  | V  | N  | T  | E  | P  | E  | D  | I  | D  | C  | W  | C  | N  | L  | T  | S  | T  | W  | V  | M  | Y  | G  | T  | C  | T  | Q  | S  | G  | E  | R  | R  | R  | E  | K  | R  |
| Geno III*          | D  | T  | V  | T  | Y  | K  | C  | P  | L  | L  | V  | N  | T  | E  | P  | E  | D  | I  | D  | C  | W  | C  | N  | L  | T  | S  | T  | W  | V  | M  | Y  | G  | T  | C  | T  | Q  | N  | G  | E  | R  | R  | R  | E  | K  | R  |
| Geno IV (sylvatic) | D  | T  | V  | T  | Y  | K  | C  | P  | L  | L  | V  | N  | T  | E  | P  | E  | D  | I  | D  | C  | W  | C  | N  | S  | T  | S  | T  | W  | V  | T  | Y  | G  | T  | C  | T  | Q  | S  | G  | E  | R  | R  | R  | E  | K  | R  |
| Geno V             | D  | T  | V  | M  | Y  | K  | C  | P  | L  | L  | V  | N  | T  | E  | P  | E  | D  | I  | D  | C  | W  | C  | N  | L  | T  | S  | T  | W  | V  | M  | Y  | G  | T  | C  | T  | Q  | S  | G  | E  | R  | R  | R  | E  | K  | R  |

**Supplemental Figure 3. Sequence alignment of pr protein.** Related to Figure 4. For the genotype IIa and III (\*) envelope sequences used in our panel, paired pr sequences were not available. Consensus pr sequences based on those available from other viruses within genotypes IIa and III in the phylogenetic tree are shown.

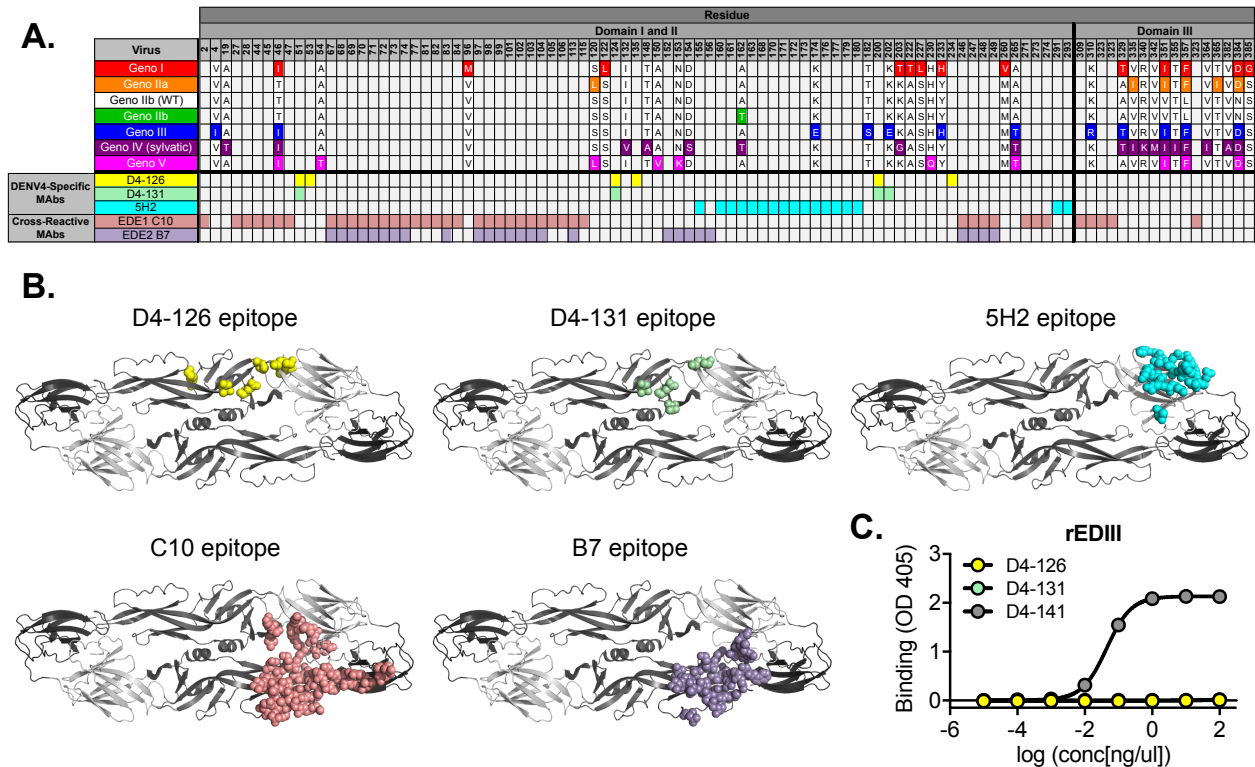

**Supplemental Figure 4. Epitopes of DENV serotype-specific and cross-reactive antibodies.** Related to Figures 5-6. A) Amino acid sequences of DENV4 genotype viruses with known monoclonal antibodies contact residues highlighted. B) Monoclonal antibody contact residues are mapped onto the envelope dimer (PBD = 10AN). C) Monoclonal antibody D4-141 binds recombinant envelope domain III (rEDIII) protein.

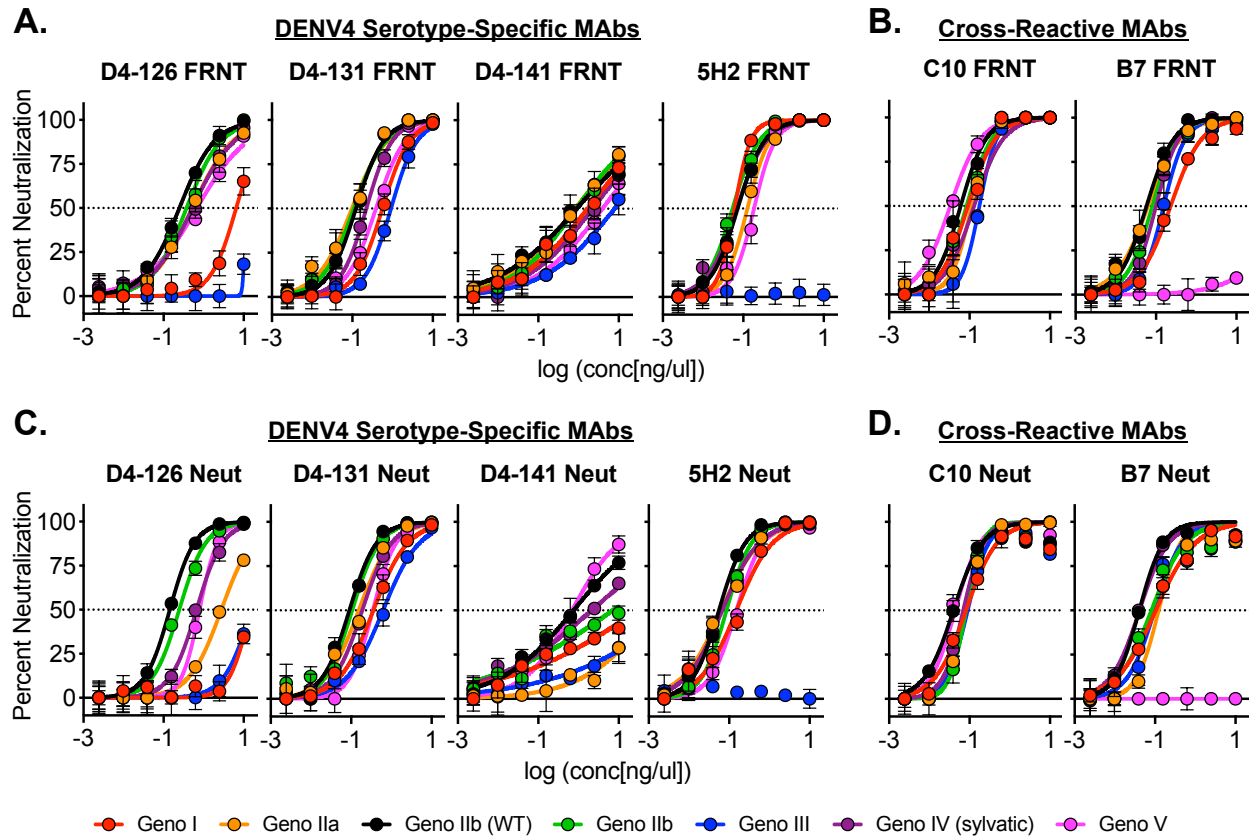

**Supplemental Figure 5. Monoclonal antibody neutralization curves.** Related to Figure 6. DENV4 serotype-specific antibodies D4-126, D4-131, D4-141 and 5H2 and DENV cross-reactive antibodies C10 and B7 were evaluated for their ability to neutralize DENV4 genotype viruses in a A) Vero cell focus reduction neutralization test (FRNT) and B) flow-cytometry-based neutralization assay (Neut) (mean  $\pm$  SD of biological triplicates).

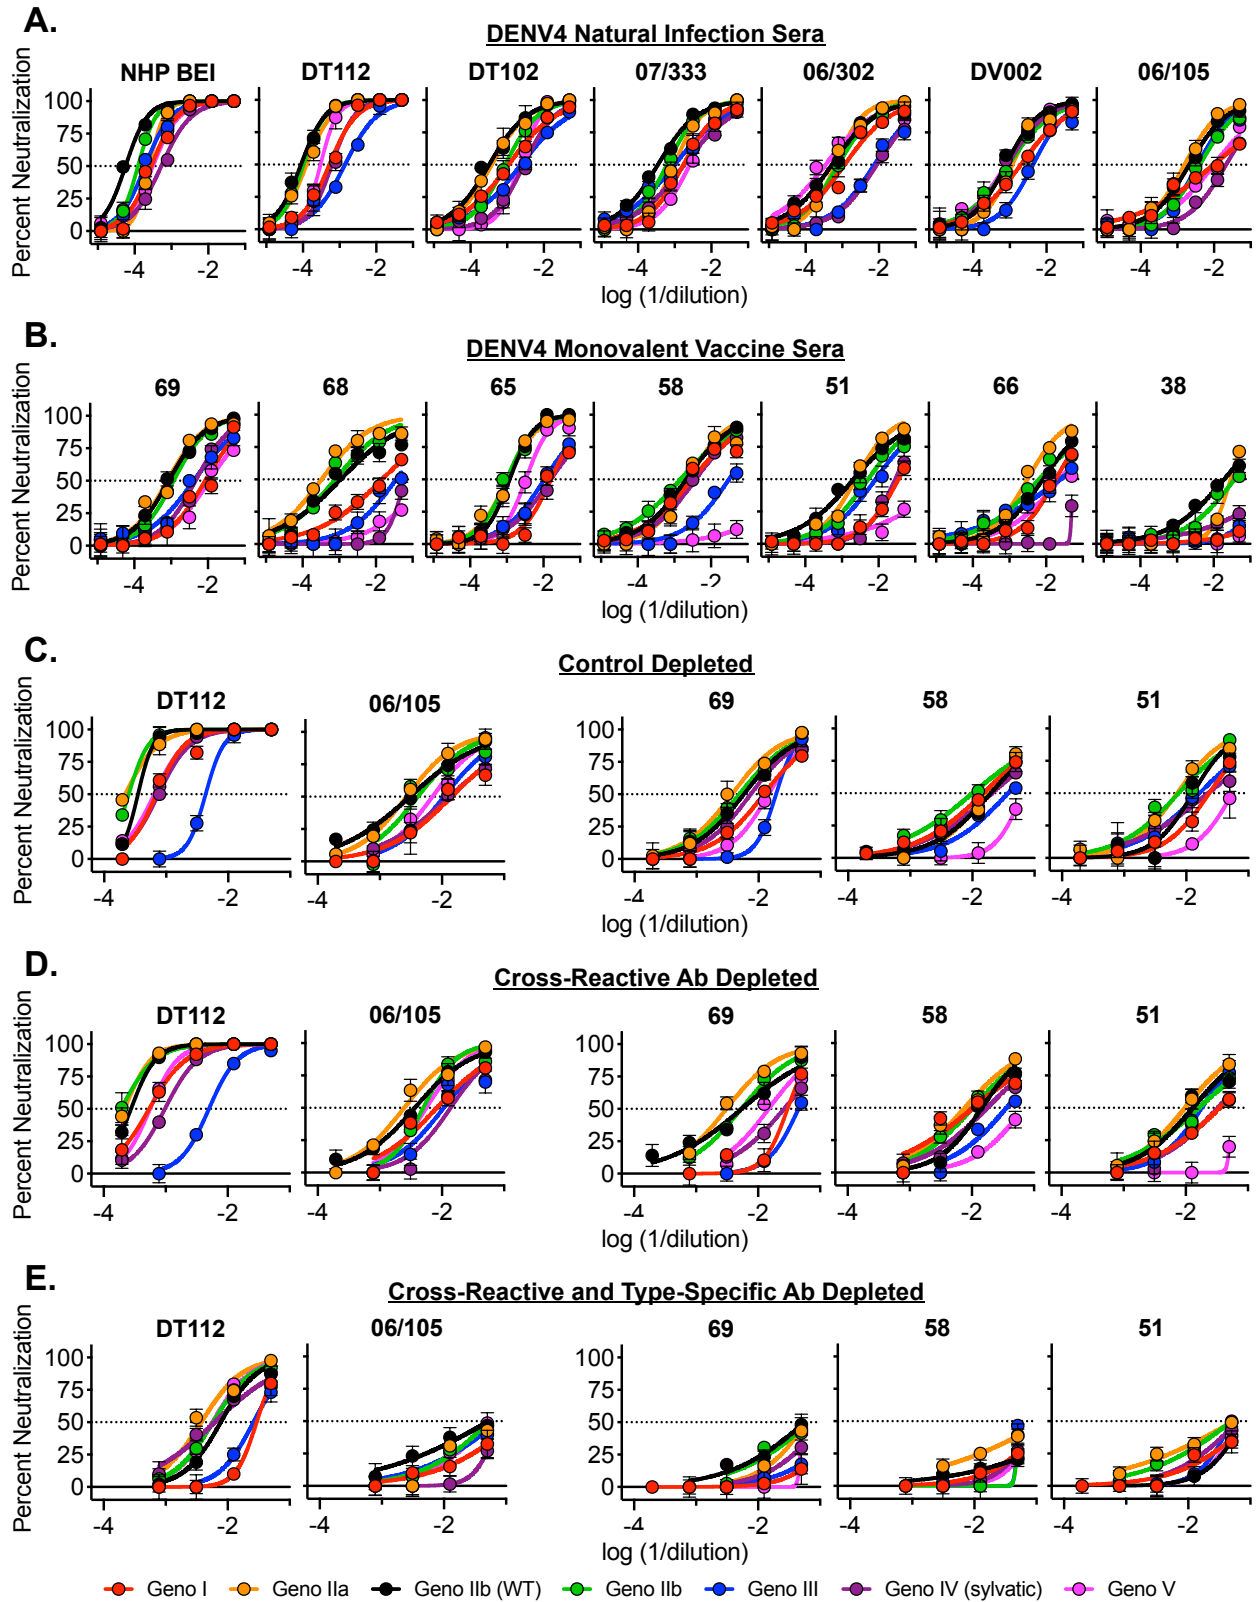

**Supplemental Figure 6. DENV4 natural infection and monovalent vaccine immune sera neutralization curves.** Related to Figure 7. Using Vero cell focus reduction neutralization test (FRNT), A) pooled polyclonal immune sera

from DENV4 infected non-human primates (NHP) or from naturally infected individuals, or from B) individuals who received the NIH DENV4 monovalent vaccine were evaluated for their ability to neutralize DENV4 genotype viruses. DENV4 natural infection and monovalent vaccine sera were C) control depleted with BSA, D) depleted of cross-reactive antibodies, or E) depleted of all DENV antibodies and evaluated for their ability to neutralize DENV4 genotype viruses (mean  $\pm$  SD of biological duplicates).

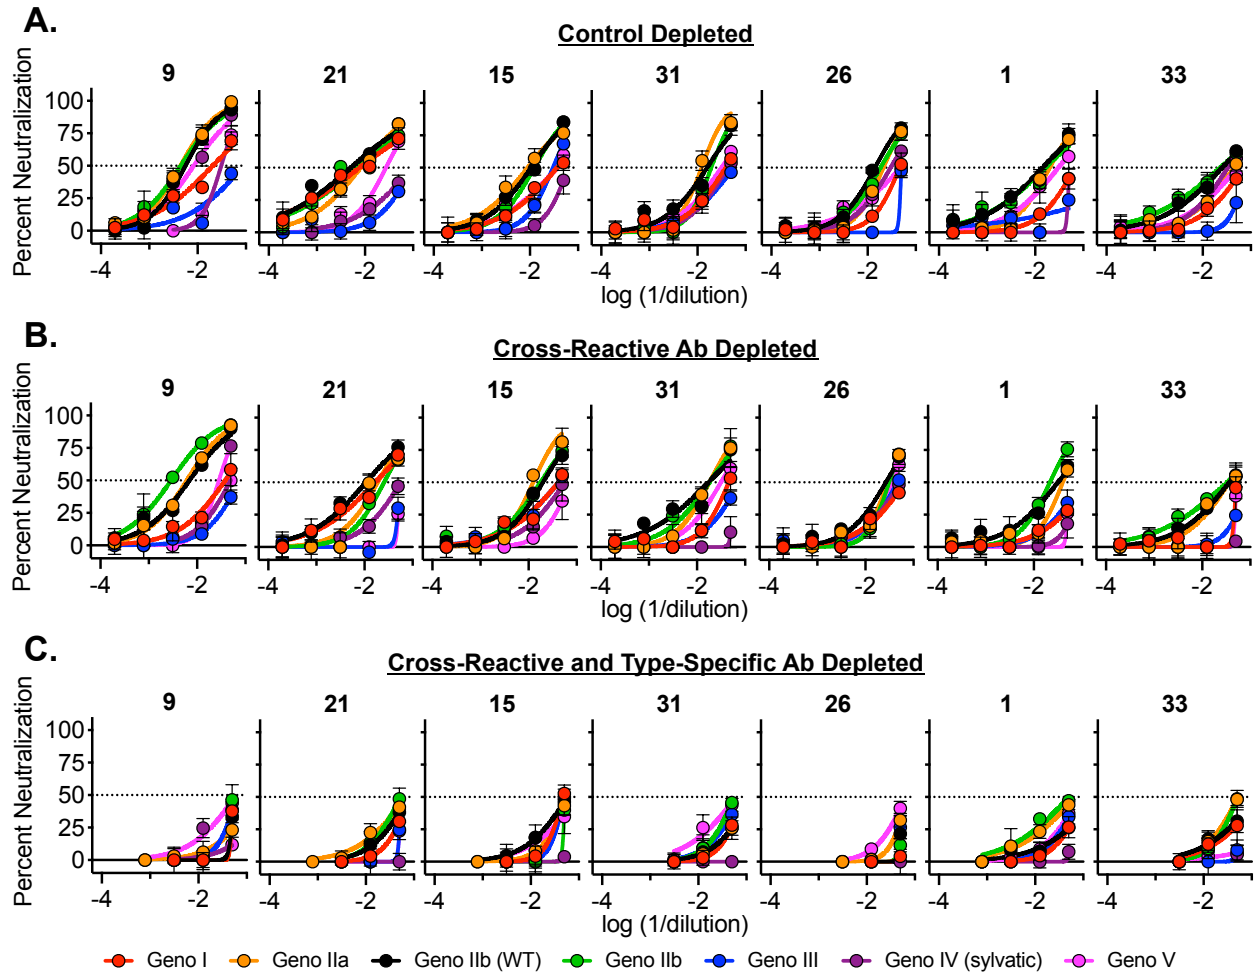

**Supplemental Figure 7. DENV tetraivalent vaccine immune sera neutralization curves.** Related to Figure 7. Using Vero cell focus reduction neutralization test (FRNT), DENV tetraivalent immune sera were A) control depleted with BSA, B) depleted of cross-reactive antibodies, or C) depleted of all DENV antibodies and evaluated for their ability to neutralize DENV4 genotype viruses (mean  $\pm$  SD of biological duplicates).

| <b><u>Genotype</u></b> | <b><u>Location</u></b> | <b><u>Year</u></b> | <b><u>Accession Number</u></b> |
|------------------------|------------------------|--------------------|--------------------------------|
| Genotype I             | Cambodia               | 2010               | KF543272.1                     |
| Genotype IIa           | French Polynesia       | 2009               | JN832541.1                     |
| Genotype IIb           | Puerto Rico            | 1999               | FJ882599.1                     |
| Genotype IIb (WT)      | Sri Lanka              | 1992               | KJ160504.1                     |
| Genotype III           | Thailand               | 2001               | AY618940.1                     |
| Genotype IV            | Malaysia               | 1973               | AF231724.1                     |
| Genotype V             | India                  | 1961               | JF262783.1                     |

**Supplemental Table 1. Viruses in recombinant DENV4 variant panel.** Related to Figures 1-2.



| Name                               | Description                                                                               | Region           | Genotype |
|------------------------------------|-------------------------------------------------------------------------------------------|------------------|----------|
| D4/13DX3-741_JX644006              | Dengue virus 4 strain 13DX3-741 envelope protein gene, partial cds                        | Vietnam          | I        |
| D4/13DX3-773_JX644009              | Dengue virus 4 strain 13DX3-773 envelope protein gene, partial cds                        | Vietnam          | I        |
| D4/13DX3-779_JX644008              | Dengue virus 4 strain 13DX3-779 envelope protein gene, partial cds                        | Vietnam          | I        |
| D4/13DX4-413_JX644007              | Dengue virus 4 strain 13DX4-413 envelope protein gene, partial cds                        | Vietnam          | I        |
| D4/13DX4-417_JX644010              | Dengue virus 4 strain 13DX4-417 envelope protein gene, partial cds                        | Vietnam          | I        |
| D4/13DX4-446_JX644011              | Dengue virus 4 strain 13DX4-446 envelope protein gene, partial cds                        | Vietnam          | I        |
| D4/13DX4-452_JX644012              | Dengue virus 4 strain 13DX4-452 envelope protein gene, partial cds                        | Vietnam          | I        |
| D4/China/YN/15DGR284/2015_KX262925 | Dengue virus 4 isolate DENV-4/China/YN/15DGR284 (2015) envelope protein gene, partial cds | China            | I        |
| D4/China/YN/15DGR32/2015_KX262923  | Dengue virus 4 isolate DENV-4/China/YN/15DGR32 (2015) envelope protein gene, partial cds  | China            | I        |
| D4/China/YN/15DGR34/2015_KX262920  | Dengue virus 4 isolate DENV-4/China/YN/15DGR34 (2015) envelope protein gene, partial cds  | China            | I        |
| D4/China/YN/15DGR35/2015_KX262921  | Dengue virus 4 isolate DENV-4/China/YN/15DGR35 (2015) envelope protein gene, partial cds  | China            | I        |
| D4/China/YN/15DGR394/2015_KX262926 | Dengue virus 4 isolate DENV-4/China/YN/15DGR394 (2015) envelope protein gene, partial cds | China            | I        |
| D4/China/YN/15DGR50/2015_KX262924  | Dengue virus 4 isolate DENV-4/China/YN/15DGR50 (2015) envelope protein gene, partial cds  | China            | I        |
| D4/China/YN/15DGR9/2015_KX262922   | Dengue virus 4 isolate DENV-4/China/YN/15DGR9 (2015) envelope protein gene, partial cds   | China            | I        |
| D4/H781363_QJ513345                | Dengue virus 4 strain H781363, complete genome                                            | Brazil           | I        |
| D4/Hu/Cambodia/NRTqs/2013_AB873105 | Dengue virus 4 gene for envelope protein, partial cds, strain: D4/Hu/Cambodia/NRTqs/2013  | Cambodia         | I        |
| D4/SG(EHI)D4/02990Y14_KX224312     | Dengue virus 4 isolate SG(EHI)D4/02990Y14, complete genome                                | Singapore        | I        |
| D4/U0811386_KF543272               | Dengue virus 4 isolate U0811386 polyprotein gene, partial cds                             | Cambodia         | I        |
| D4/CO/BID-V3406/2001_GQ868579      | Dengue virus 4 isolate DENV-4/CO/BID-V3406/2001, complete genome                          | Colombia         | IIa      |
| D4/CO/BID-V3410/2004_GQ868583      | Dengue virus 4 isolate DENV-4/CO/BID-V3410/2004, complete genome                          | Colombia         | IIa      |
| D4/CO/BID-V3411/2004_GQ868584      | Dengue virus 4 isolate DENV-4/CO/BID-V3411/2004, complete genome                          | Colombia         | IIa      |
| D4/CO/BID-V3412/2005_GQ868585      | Dengue virus 4 isolate DENV-4/CO/BID-V3412/2005, complete genome                          | Colombia         | IIa      |
| D4/H772846_QJ513330                | Dengue virus 4 strain H772846, complete genome                                            | Brazil           | IIa      |
| D4/H772852_QJ513331                | Dengue virus 4 strain H772852, complete genome                                            | Brazil           | IIa      |
| D4/H772854_JN559741                | Dengue virus 4 strain H772854, complete genome                                            | Brazil           | IIa      |
| D4/H773583_QJ513332                | Dengue virus 4 strain H773583, complete genome                                            | Brazil           | IIa      |
| D4/H774846_QJ513333                | Dengue virus 4 strain H774846, complete genome                                            | Brazil           | IIa      |
| D4/H779228_QJ513338                | Dengue virus 4 strain H779228, complete genome                                            | Brazil           | IIa      |
| D4/H779652_QJ513339                | Dengue virus 4 strain H779652, complete genome                                            | Brazil           | IIa      |
| D4/H780090_QJ513340                | Dengue virus 4 strain H780090, complete genome                                            | Brazil           | IIa      |
| D4/H780120_QJ513341                | Dengue virus 4 strain H780120, complete genome                                            | Brazil           | IIa      |
| D4/H780556_QJ513342                | Dengue virus 4 strain H780556, complete genome                                            | Brazil           | IIa      |
| D4/H780563_QJ513343                | Dengue virus 4 strain H780563, complete genome                                            | Brazil           | IIa      |
| D4/H780571_QJ513344                | Dengue virus 4 strain H780571, complete genome                                            | Brazil           | IIa      |
| D4/MT/BR12_TVP17898/2012_KJ579243  | Dengue virus 4 strain DENV-4/MT/BR12_TVP17898/2012 isolate serum_12, complete genome      | Brazil           | IIa      |
| D4/MT/BR2_TVP17888/2012_KJ579240   | Dengue virus 4 strain DENV-4/MT/BR2_TVP17888/2012 isolate serum_2, complete genome        | Brazil           | IIa      |
| D4/MT/BR20_TVP17906/2012_KJ579244  | Dengue virus 4 strain DENV-4/MT/BR20_TVP17906/2012 isolate serum_20, complete genome      | Brazil           | IIa      |
| D4/MT/BR23_TVP17909/2012_KJ579245  | Dengue virus 4 strain DENV-4/MT/BR23_TVP17909/2012 isolate serum_23, complete genome      | Brazil           | IIa      |
| D4/MT/BR24_TVP17910/2012_KJ579246  | Dengue virus 4 strain DENV-4/MT/BR24_TVP17910/2012 isolate serum_24, complete genome      | Brazil           | IIa      |
| D4/MT/BR27_TVP17913/2012_KJ579247  | Dengue virus 4 strain DENV-4/MT/BR27_TVP17913/2012 isolate serum_27, complete genome      | Brazil           | IIa      |
| D4/MT/BR28_TVP17914/2012_KJ579248  | Dengue virus 4 strain DENV-4/MT/BR28_TVP17914/2012 isolate serum_28, complete genome      | Brazil           | IIa      |
| D4/MT/BR33_TVP17919/2012_KJ596658  | Dengue virus 4 strain DENV-4/MT/BR33_TVP17919/2012 isolate serum_33, complete genome      | Brazil           | IIa      |
| D4/MT/BR35_TVP17921/2012_KJ596659  | Dengue virus 4 strain DENV-4/MT/BR35_TVP17921/2012 isolate serum_35, complete genome      | Brazil           | IIa      |
| D4/MT/BR40_TVP17926/2012_KJ596660  | Dengue virus 4 strain DENV-4/MT/BR40_TVP17926/2012 isolate serum_40, complete genome      | Brazil           | IIa      |
| D4/MT/BR44_TVP17930/2012_KJ596661  | Dengue virus 4 strain DENV-4/MT/BR44_TVP17930/2012 isolate serum_44, complete genome      | Brazil           | IIa      |
| D4/MT/BR47_TVP17933/2012_KJ596662  | Dengue virus 4 strain DENV-4/MT/BR47_TVP17933/2012 isolate serum_47, complete genome      | Brazil           | IIa      |
| D4/MT/BR48_TVP17934/2012_KJ596663  | Dengue virus 4 strain DENV-4/MT/BR48_TVP17934/2012 isolate serum_48, complete genome      | Brazil           | IIa      |
| D4/MT/BR50_TVP18148/2012_KJ596664  | Dengue virus 4 strain DENV-4/MT/BR50_TVP18148/2012 isolate serum_50, complete genome      | Brazil           | IIa      |
| D4/MT/BR52_TVP17938/2012_KJ596665  | Dengue virus 4 strain DENV-4/MT/BR52_TVP17938/2012 isolate serum_52, complete genome      | Brazil           | IIa      |
| D4/MT/BR53_TVP17939/2012_KJ596666  | Dengue virus 4 strain DENV-4/MT/BR53_TVP17939/2012 isolate serum_53, complete genome      | Brazil           | IIa      |
| D4/MT/BR55_TVP17941/2012_KJ596667  | Dengue virus 4 strain DENV-4/MT/BR55_TVP17941/2012 isolate serum_55, complete genome      | Brazil           | IIa      |
| D4/MT/BR60_TVP17946/2012_KJ596668  | Dengue virus 4 strain DENV-4/MT/BR60_TVP17946/2012 isolate serum_60, complete genome      | Brazil           | IIa      |
| D4/MT/BR73_TVP17951/2012_KJ596669  | Dengue virus 4 strain DENV-4/MT/BR73_TVP17951/2012 isolate serum_73, complete genome      | Brazil           | IIa      |
| D4/MT/BR76_TVP17953/2012_KJ596670  | Dengue virus 4 strain DENV-4/MT/BR76_TVP17953/2012 isolate serum_76, complete genome      | Brazil           | IIa      |
| D4/MT/BR8_TVP17894/2012_KJ579241   | Dengue virus 4 strain DENV-4/MT/BR8_TVP17894/2012 isolate serum_8, complete genome        | Brazil           | IIa      |
| D4/MT/BR84_TVP17961/2012_KJ596671  | Dengue virus 4 strain DENV-4/MT/BR84_TVP17961/2012 isolate serum_84, complete genome      | Brazil           | IIa      |
| D4/MT/BR9_TVP17895/2012_KJ579242   | Dengue virus 4 strain DENV-4/MT/BR9_TVP17895/2012 isolate serum_9, complete genome        | Brazil           | IIa      |
| D4/MT/BR91_TVP17968/2012_KJ596672  | Dengue virus 4 strain DENV-4/MT/BR91_TVP17968/2012 isolate serum_91, complete genome      | Brazil           | IIa      |
| D4/MT/BR92_TVP17969/2012_KJ596673  | Dengue virus 4 strain DENV-4/MT/BR92_TVP17969/2012 isolate serum_92, complete genome      | Brazil           | IIa      |
| D4/MT/BR94_TVP17971/2012_KJ596674  | Dengue virus 4 strain DENV-4/MT/BR94_TVP17971/2012 isolate serum_94, complete genome      | Brazil           | IIa      |
| D4/PF09/220709-54_JN832541         | Dengue virus 4 isolate PF09/220709-54 envelope protein (E) gene, partial cds              | French Polynesia | IIa      |
| D4/SG(EHI)D4/20293Y13_KX224301     | Dengue virus 4 isolate SG(EHI)D4/20293Y13 envelope protein gene, partial cds              | Singapore        | IIa      |
| D4/SG(EHI)D4/21661Y13_KX224302     | Dengue virus 4 isolate SG(EHI)D4/21661Y13 envelope protein gene, partial cds              | Singapore        | IIa      |
| D4/SG(EHI)D4/25974Y13_KX224304     | Dengue virus 4 isolate SG(EHI)D4/25974Y13 envelope protein gene, partial cds              | Singapore        | IIa      |
| D4/SG(EHI)D4/30313Y13_KX224311     | Dengue virus 4 isolate SG(EHI)D4/30313Y13 envelope protein gene, partial cds              | Singapore        | IIa      |
| D4/SG/06K2270DK1/2005_GQ398256     | Dengue virus 4 strain DENV-4/SG/06K2270DK1/2005, complete genome                          | Singapore        | IIa      |
| D4/VE/BID-V1153/2007_GQ868642      | Dengue virus 4 isolate DENV-4/VE/BID-V1153/2007, complete genome                          | Venezuela        | IIa      |
| D4/VE/BID-V1154/2007_GQ868643      | Dengue virus 4 isolate DENV-4/VE/BID-V1154/2007, complete genome                          | Venezuela        | IIa      |
| D4/VE/BID-V1155/2007_GQ868644      | Dengue virus 4 isolate DENV-4/VE/BID-V1155/2007, complete genome                          | Venezuela        | IIa      |
| D4/VE/BID-V1156/2007_GQ868645      | Dengue virus 4 isolate DENV-4/VE/BID-V1156/2007, complete genome                          | Venezuela        | IIa      |
| D4/VE/BID-V1157/2007_EU854299      | Dengue virus 4 isolate DENV-4/VE/BID-V1157/2007, complete genome                          | Venezuela        | IIa      |
| D4/VE/BID-V1158/2007_FJ182016      | Dengue virus 4 isolate DENV-4/VE/BID-V1158/2007, complete genome                          | Venezuela        | IIa      |
| D4/VE/BID-V1159/2007_EU854300      | Dengue virus 4 isolate DENV-4/VE/BID-V1159/2007, complete genome                          | Venezuela        | IIa      |
| D4/VE/BID-V1160/2007_FJ182017      | Dengue virus 4 isolate DENV-4/VE/BID-V1160/2007, complete genome                          | Venezuela        | IIa      |
| D4/VE/BID-V1161/2007_EU854301      | Dengue virus 4 isolate DENV-4/VE/BID-V1161/2007, complete genome                          | Venezuela        | IIa      |
| D4/VE/BID-V2163/1998_FJ639736      | Dengue virus 4 isolate DENV-4/VE/BID-V2163/1998, complete genome                          | Venezuela        | IIa      |
| D4/VE/BID-V2164/1998_FJ639737      | Dengue virus 4 isolate DENV-4/VE/BID-V2164/1998, complete genome                          | Venezuela        | IIa      |
| D4/VE/BID-V2165/1998_FJ639738      | Dengue virus 4 isolate DENV-4/VE/BID-V2165/1998, complete genome                          | Venezuela        | IIa      |
| D4/VE/BID-V2166/1998_FJ639739      | Dengue virus 4 isolate DENV-4/VE/BID-V2166/1998, complete genome                          | Venezuela        | IIa      |
| D4/VE/BID-V2167/1998_JN819409      | Dengue virus 4 isolate DENV-4/VE/BID-V2167/1998, complete genome                          | Venezuela        | IIa      |
| D4/VE/BID-V2170/1999_FJ639742      | Dengue virus 4 isolate DENV-4/VE/BID-V2170/1999, complete genome                          | Venezuela        | IIa      |
| D4/VE/BID-V2172/1999_FJ639744      | Dengue virus 4 isolate DENV-4/VE/BID-V2172/1999, complete genome                          | Venezuela        | IIa      |
| D4/VE/BID-V2173/1999_FJ639745      | Dengue virus 4 isolate DENV-4/VE/BID-V2173/1999, complete genome                          | Venezuela        | IIa      |
| D4/VE/BID-V2176/2000_FJ850095      | Dengue virus 4 isolate DENV-4/VE/BID-V2176/2000, complete genome                          | Venezuela        | IIa      |
| D4/VE/BID-V2177/2000_FJ639748      | Dengue virus 4 isolate DENV-4/VE/BID-V2177/2000, complete genome                          | Venezuela        | IIa      |
| D4/VE/BID-V2194/2001_FJ639764      | Dengue virus 4 isolate DENV-4/VE/BID-V2194/2001, complete genome                          | Venezuela        | IIa      |
| D4/VE/BID-V2206/2001_FJ639773      | Dengue virus 4 isolate DENV-4/VE/BID-V2206/2001, complete genome                          | Venezuela        | IIa      |
| D4/VE/BID-V2489/2007_FJ882580      | Dengue virus 4 isolate DENV-4/VE/BID-V2489/2007, complete genome                          | Venezuela        | IIa      |

|                               |                                                                                |             |               |
|-------------------------------|--------------------------------------------------------------------------------|-------------|---------------|
| D4/VE/BID-V2490/2007_FJ882581 | Dengue virus 4 isolate DENV-4/VE/BID-V2490/2007, complete genome               | Venezuela   | Ila           |
| D4/VE/BID-V2491/2007_FJ882582 | Dengue virus 4 isolate DENV-4/VE/BID-V2491/2007, complete genome               | Venezuela   | Ila           |
| D4/VE/BID-V2492/2007_FJ882583 | Dengue virus 4 isolate DENV-4/VE/BID-V2492/2007, complete genome               | Venezuela   | Ila           |
| D4/VE/BID-V2493/2007_FJ882584 | Dengue virus 4 isolate DENV-4/VE/BID-V2493/2007, complete genome               | Venezuela   | Ila           |
| D4/VE/BID-V2494/2007_FJ882585 | Dengue virus 4 isolate DENV-4/VE/BID-V2494/2007, complete genome               | Venezuela   | Ila           |
| D4/VE/BID-V2495/2007_FJ882586 | Dengue virus 4 isolate DENV-4/VE/BID-V2495/2007, complete genome               | Venezuela   | Ila           |
| D4/VE/BID-V2496/2007_FJ882587 | Dengue virus 4 isolate DENV-4/VE/BID-V2496/2007, complete genome               | Venezuela   | Ila           |
| D4/VE/BID-V2497/2007_FJ882588 | Dengue virus 4 isolate DENV-4/VE/BID-V2497/2007, complete genome               | Venezuela   | Ila           |
| D4/VE/BID-V2498/2007_FJ882589 | Dengue virus 4 isolate DENV-4/VE/BID-V2498/2007, complete genome               | Venezuela   | Ila           |
| D4/VE/BID-V2499/2007_FJ882590 | Dengue virus 4 isolate DENV-4/VE/BID-V2499/2007, complete genome               | Venezuela   | Ila           |
| D4/VE/BID-V2500/2007_FJ882591 | Dengue virus 4 isolate DENV-4/VE/BID-V2500/2007, complete genome               | Venezuela   | Ila           |
| D4/VE/BID-V2501/2008_FJ882592 | Dengue virus 4 isolate DENV-4/VE/BID-V2501/2008, complete genome               | Venezuela   | Ila           |
| D4/VE/BID-V2607/2006_JN819406 | Dengue virus 4 isolate DENV-4/VE/BID-V2607/2006, complete genome               | Venezuela   | Ila           |
| D4/VE/BID-V2610/2007_GQ199876 | Dengue virus 4 isolate DENV-4/VE/BID-V2610/2007, complete genome               | Venezuela   | Ila           |
| D4/ARC-1-13_KF809760          | Dengue virus 4 strain ARC-1-13 envelope protein gene, partial cds              | Puerto Rico | Ilb           |
| D4/ARC-33-13_KF809761         | Dengue virus 4 strain ARC-33-13 envelope protein gene, partial cds             | Puerto Rico | Ilb           |
| D4/ARC-55-12_KF809754         | Dengue virus 4 strain ARC-55-12 envelope protein gene, partial cds             | Puerto Rico | Ilb           |
| D4/ARC-65-12_KF809755         | Dengue virus 4 strain ARC-65-12 envelope protein gene, partial cds             | Puerto Rico | Ilb           |
| D4/ARC-65-13_KF809762         | Dengue virus 4 strain ARC-65-13 envelope protein gene, partial cds             | Puerto Rico | Ilb           |
| D4/ARC-69-12_KF809756         | Dengue virus 4 strain ARC-69-12 envelope protein gene, partial cds             | Puerto Rico | Ilb           |
| D4/ARC-75-12_KF809757         | Dengue virus 4 strain ARC-75-12 envelope protein gene, partial cds             | Puerto Rico | Ilb           |
| D4/ARC-78-12_KF809758         | Dengue virus 4 strain ARC-78-12 envelope protein gene, partial cds             | Puerto Rico | Ilb           |
| D4/ARC-80-12_KF809759         | Dengue virus 4 strain ARC-80-12 envelope protein gene, partial cds             | Puerto Rico | Ilb           |
| D4/CO/BID-V1600/1997_FJ024476 | Dengue virus 4 isolate DENV-4/CO/BID-V1600/1997, complete genome               | Colombia    | Ilb           |
| D4/CO/BID-V3407/2001_GQ868580 | Dengue virus 4 isolate DENV-4/CO/BID-V3407/2001, complete genome               | Colombia    | Ilb           |
| D4/CO/BID-V3408/2001_GQ868581 | Dengue virus 4 isolate DENV-4/CO/BID-V3408/2001, complete genome               | Colombia    | Ilb           |
| D4/CO/BID-V3409/2001_GQ868582 | Dengue virus 4 isolate DENV-4/CO/BID-V3409/2001, complete genome               | Colombia    | Ilb           |
| D4/H402276_JN559740           | Dengue virus 4 strain H402276, complete genome                                 | Brazil      | Ilb           |
| D4/H775222_JQ513334           | Dengue virus 4 strain H775222, complete genome                                 | Brazil      | Ilb           |
| D4/H778494_JQ513335           | Dengue virus 4 strain H778494, complete genome                                 | Brazil      | Ilb           |
| D4/H778504_JQ513336           | Dengue virus 4 strain H778504, complete genome                                 | Brazil      | Ilb           |
| D4/H778887_JQ513337           | Dengue virus 4 strain H778887, complete genome                                 | Brazil      | Ilb           |
| D4/IDENV4_KJ160504            | Dengue virus 4 isolate rDENV4, complete genome                                 | Sri Lanka   | Ilb           |
| D4/US/BID-V1082/1998_FJ024424 | Dengue virus 4 isolate DENV-4/US/BID-V1082/1998, complete genome               | USA         | Ilb           |
| D4/US/BID-V1083/1986_EU854295 | Dengue virus 4 isolate DENV-4/US/BID-V1083/1986, complete genome               | USA         | Ilb           |
| D4/US/BID-V1093/1998_EU854296 | Dengue virus 4 isolate DENV-4/US/BID-V1093/1998, complete genome               | USA         | Ilb           |
| D4/US/BID-V1094/1998_EU854297 | Dengue virus 4 isolate DENV-4/US/BID-V1094/1998, complete genome               | USA         | Ilb           |
| D4/US/BID-V2429/1994_GQ199878 | Dengue virus 4 isolate DENV-4/US/BID-V2429/1994, complete genome               | USA         | Ilb           |
| D4/US/BID-V2430/1994_GQ199879 | Dengue virus 4 isolate DENV-4/US/BID-V2430/1994, complete genome               | USA         | Ilb           |
| D4/US/BID-V2431/1995_GQ199880 | Dengue virus 4 isolate DENV-4/US/BID-V2431/1995, complete genome               | USA         | Ilb           |
| D4/US/BID-V2432/1995_GQ252675 | Dengue virus 4 isolate DENV-4/US/BID-V2432/1995, complete genome               | USA         | Ilb           |
| D4/US/BID-V2433/1995_FJ810417 | Dengue virus 4 isolate DENV-4/US/BID-V2433/1995, complete genome               | USA         | Ilb           |
| D4/US/BID-V2434/1995_FJ850057 | Dengue virus 4 isolate DENV-4/US/BID-V2434/1995, complete genome               | USA         | Ilb           |
| D4/US/BID-V2435/1996_GQ199881 | Dengue virus 4 isolate DENV-4/US/BID-V2435/1996, complete genome               | USA         | Ilb           |
| D4/US/BID-V2436/1996_GQ199882 | Dengue virus 4 isolate DENV-4/US/BID-V2436/1996, complete genome               | USA         | Ilb           |
| D4/US/BID-V2437/1996_GQ199883 | Dengue virus 4 isolate DENV-4/US/BID-V2437/1996, complete genome               | USA         | Ilb           |
| D4/US/BID-V2438/1996_GQ199884 | Dengue virus 4 isolate DENV-4/US/BID-V2438/1996, complete genome               | USA         | Ilb           |
| D4/US/BID-V2439/1996_GQ199885 | Dengue virus 4 isolate DENV-4/US/BID-V2439/1996, complete genome               | USA         | Ilb           |
| D4/US/BID-V2440/1996_FJ850058 | Dengue virus 4 isolate DENV-4/US/BID-V2440/1996, complete genome               | USA         | Ilb           |
| D4/US/BID-V2441/1998_FJ882595 | Dengue virus 4 isolate DENV-4/US/BID-V2441/1998, complete genome               | USA         | Ilb           |
| D4/US/BID-V2442/1998_FJ882596 | Dengue virus 4 isolate DENV-4/US/BID-V2442/1998, complete genome               | USA         | Ilb           |
| D4/US/BID-V2443/1998_FJ850059 | Dengue virus 4 isolate DENV-4/US/BID-V2443/1998, complete genome               | USA         | Ilb           |
| D4/US/BID-V2444/1998_FJ882597 | Dengue virus 4 isolate DENV-4/US/BID-V2444/1998, complete genome               | USA         | Ilb           |
| D4/US/BID-V2445/1998_FJ882598 | Dengue virus 4 isolate DENV-4/US/BID-V2445/1998, complete genome               | USA         | Ilb           |
| D4/US/BID-V2446/1999_FJ882599 | Dengue virus 4 isolate DENV-4/US/BID-V2446/1999, complete genome               | USA         | Ilb           |
| D4/US/BID-V2447/1999_FJ882600 | Dengue virus 4 isolate DENV-4/US/BID-V2447/1999, complete genome               | USA         | Ilb           |
| D4/US/BID-V2448/1999_FJ882601 | Dengue virus 4 isolate DENV-4/US/BID-V2448/1999, complete genome               | USA         | Ilb           |
| D4/US/BID-V860/1994_FJ226067  | Dengue virus 4 isolate DENV-4/US/BID-V860/1994, complete genome                | USA         | Ilb           |
| D4/0017/1997_AY618978         | Dengue virus type 4 strain ThD4_0017_97 envelope protein (E) gene, partial cds | Thailand    | III           |
| D4/0164/1999_AY618986         | Dengue virus type 4 strain ThD4_0164_99 envelope protein (E) gene, partial cds | Thailand    | III           |
| D4/0439/2001_AY618940         | Dengue virus type 4 strain ThD4_0439_01 envelope protein (E) gene, partial cds | Thailand    | III           |
| D4/0476/1997_AY618979         | Dengue virus type 4 strain ThD4_0476_97 envelope protein (E) gene, partial cds | Thailand    | III           |
| D4/1270/1998_AY618981         | Dengue virus type 4 strain ThD4_1270_98 envelope protein (E) gene, partial cds | Thailand    | III           |
| D4/P73-1120_AF231724          | Dengue virus type 4 isolate P73-1120 envelope protein (E) gene, partial cds    | Malaysia    | IV (sylvatic) |
| D4/P75-215_AF231725           | Dengue virus type 4 isolate P75-215 envelope protein (E) gene, partial cds     | Malaysia    | IV (sylvatic) |
| D4/P75-514_AF231723           | Dengue virus type 4 isolate P75-514 envelope protein (E) gene, partial cds     | Malaysia    | IV (sylvatic) |
| D4/Hu/Thailand/1963_DVU18440  | Dengue virus type 4 Thailand 1963 polyprotein gene, partial cds                | Thailand    | V             |
| D4/IND/0952326/2009_JQ922560  | Dengue virus 4 isolate DENV-4/IND/0952326/2009, complete genome                | India       | V             |
| D4/IND/624000/1962_JQ922558   | Dengue virus 4 isolate DENV-4/IND/624000/1962, complete genome                 | India       | V             |
| D4/IND/793679/1979_JQ922559   | Dengue virus 4 isolate DENV-4/IND/793679/1979, complete genome                 | India       | V             |
| D4/INDIA-G11337_JF262783      | Dengue virus 4 isolate INDIA G11337, complete genome                           | India       | V             |
| D4/KBPV-VR-31_KP406806        | Dengue virus 4 isolate DENV-4/KBPV-VR-31, complete genome                      | South Korea | V             |
| D4/NIV-611319_JQ686059        | Dengue virus 4 strain NIV_611319 envelope protein gene, partial cds            | India       | V             |
| D4/NIV-62231_JQ686066         | Dengue virus 4 strain NIV_62231 envelope protein gene, partial cds             | India       | V             |
| D4/NIV-62235_JQ686065         | Dengue virus 4 strain NIV_62235 envelope protein gene, partial cds             | India       | V             |
| D4/NIV-624000_JQ686064        | Dengue virus 4 strain NIV_624000 envelope protein gene, partial cds            | India       | V             |
| D4/NIV-631302_JQ686057        | Dengue virus 4 strain NIV_631302 envelope protein gene, partial cds            | India       | V             |
| D4/NIV-64431_JQ686060         | Dengue virus 4 strain NIV_64431 envelope protein gene, partial cds             | India       | V             |
| D4/NIV-654021_JQ686062        | Dengue virus 4 strain NIV_654021 envelope protein gene, partial cds            | India       | V             |
| D4/NIV-654129-2_JQ686061      | Dengue virus 4 strain NIV_654129-2 envelope protein gene, partial cds          | India       | V             |
| D4/NIV-793679_JQ686058        | Dengue virus 4 strain NIV_793679 envelope protein gene, partial cds            | India       | V             |
| D4/PH/BID-V3361/1956_GQ868594 | Dengue virus 4 isolate DENV-4/PH/BID-V3361/1956, complete genome               | Philippines | V             |

**Supplemental Table 2. DENV4 virus sequences in phylogenetic analyses.** Related to Figure 1. All sequences used to generate phylogenetic tree in Figure 1 are listed by sequence name, description, location of collection and genotype.

| <u>Name</u>                   | <u>Asn-67 Gly Site</u> | <u>Asn-153 Gly Site</u> | <u>Asn-153 Seq.</u> |
|-------------------------------|------------------------|-------------------------|---------------------|
| D4/Hu/Thailand/1963_DVU18440  | yes                    | no                      | NDI                 |
| D4/IND/0952326/2009_JQ922560  | yes                    | yes                     | NDT                 |
| D4/IND/624000/1962_JQ922558   | yes                    | no                      | NDI                 |
| D4/IND/793679/1979_JQ922559   | yes                    | no                      | NDI                 |
| D4/INDIA-G11337_JF262783      | yes                    | no                      | KDT                 |
| D4/KBPV-VR-31_KP406806        | yes                    | no                      | NDI                 |
| D4/NIV-611319_JQ686059        | yes                    | no                      | NDI                 |
| D4/NIV-62231_JQ686066         | yes                    | no                      | NDI                 |
| D4/NIV-62235_JQ686065         | yes                    | no                      | KDT                 |
| D4/NIV-624000_JQ686064        | yes                    | no                      | NDI                 |
| D4/NIV-631302_JQ686057        | yes                    | no                      | NDI                 |
| D4/NIV-64431_JQ686060         | yes                    | no                      | KDT                 |
| D4/NIV-654021_JQ686062        | yes                    | yes                     | NDT                 |
| D4/NIV-654129-2_JQ686061      | yes                    | no                      | NDI                 |
| D4/NIV-793679_JQ686058        | yes                    | no                      | NDI                 |
| D4/PH/BID-V3361/1956_GQ868594 | yes                    | no                      | NDI                 |

### 87.5% missing gly site

**Supplemental Table 3. Glycosylation site sequences of all genotype V sequences.** Related to Figure 4. 16 genotype V sequences used to generate phylogenetic tree in Figure 1 were evaluated to determine if glycosylation sites were present at positions 67 and 153. Fourteen of 16 sequences are missing glycosylation motif (N-X-T/S) at position 153.
